# Supplementary material for: Full genetic characterization and epidemiology of a novel amdoparvovirus in striped skunk (Mephitis mephitis)
Source: PubMed Central journal article supplement (PMC5520478; doi:10.1038/emi.2017.13), 2017-05-10
Supplement: emi201713x4.pdf [file emi201713x4.pdf]

**Supplementary Table S2. Splicing profile and viral protein details of AMDV and SKAV strains sequenced in this study and compared to the reference sequence AMDV-G**

Splicing sites were determined following what was experimentally demonstrated. Scores were assigned to donor and acceptor sites using the splicing prediction algorithm NNSPLICE from fruitfly.org.

| Strain        | Protein | Size (aa) | Exon position* | Donor score <sup>§</sup> | Exon position* <sup>§</sup> | Acceptor score <sup>§</sup> |
|---------------|---------|-----------|----------------|--------------------------|-----------------------------|-----------------------------|
| <b>AMDV</b>   |         |           |                |                          |                             |                             |
| <b>G</b>      | NS1     | 641       | 206-1961       | 1.00                     | 2042-2211                   | 0.94                        |
|               | NS2     | 114       | 206-384        | 0.95                     | 2042-2207                   | 0.94                        |
|               | NS3     | 87        | 206-384        | 0.95                     | 1737-1821                   | /                           |
|               | VP1     | 681       | 2204-2213      | 0.84                     | 2287-4322                   | 0.95                        |
|               | VP2     | 638       | 2406-4322      | /                        | /                           | /                           |
| <b>BCM-1</b>  | NS1     | 641       | 69-1824        | 1.00                     | 1906-2075                   | 0.93                        |
|               | NS2     | 114       | 69-247         | 0.93                     | 1906-2071                   | 0.93                        |
|               | NS3     | 92        | 69-247         | 0.93                     | 1600-1699                   | /                           |
| <b>BCM-3</b>  | NS1     | 641       | 69-1824        | 1.00                     | 1906-2075                   | 0.93                        |
|               | NS2     | 114       | 69-247         | 0.93                     | 1906-2071                   | 0.93                        |
|               | NS3     | 92        | 69-247         | 0.93                     | 1600-1699                   | /                           |
| <b>BCM-12</b> | NS1     | 641       | 44-1799        | 1.00                     | 1880-2049                   | 0.95                        |
|               | NS2     | 114       | 44-222         | 0.94                     | 1880-2045                   | 0.95                        |
|               | NS3     | 87        | 44-222         | 0.94                     | 1575-1659                   | /                           |
| <b>BCM-13</b> | NS1     | 641       | 45-1800        | 1.00                     | 1881-2050                   | 0.93                        |
|               | NS2     | 114       | 45-223         | 0.90                     | 1881-2046                   | 0.93                        |
|               | NS3     | 92        | 45-223         | 0.90                     | 1576-1675                   | /                           |
| <b>BCM-21</b> | NS1     | 641       | 69-1824        | 1.00                     | 1905-2074                   | 0.95                        |
|               | NS2     | 114       | 69-247         | 0.93                     | 1905-2070                   | 0.95                        |
|               | NS3     | 87        | 69-247         | 0.93                     | 1600-1684                   | /                           |
| <b>BCM-22</b> | NS1     | 641       | 69-1824        | 1.00                     | 1906-2075                   | 0.93                        |
|               | NS2     | 114       | 69-247         | 0.93                     | 1906-2071                   | 0.93                        |
|               | NS3     | 92        | 69-247         | 0.93                     | 1600-1699                   | /                           |
| <b>BCM-31</b> | NS1     | 641       | 2-1757         | 1.00                     | 1838-2007                   | 0.93                        |
|               | NS2     | 114       | 2-180          | 0.93                     | 1838-2003                   | 0.93                        |
|               | NS3     | 92        | 2-180          | 0.93                     | 1533-1632                   | /                           |
| <b>BCM-32</b> | NS1     | 641       | 69-1824        | 1.00                     | 1905-2074                   | 0.94                        |
|               | NS2     | 114       | 69-247         | 0.94                     | 1905-2070                   | 0.94                        |
|               | NS3     | 87        | 69-247         | 0.94                     | 1600-1684                   | /                           |
| <b>BCM-41</b> | NS1     | 641       | 69-1824        | 1.00                     | 1905-2074                   | 0.93                        |
|               | NS2     | 114       | 69-247         | 0.93                     | 1905-2070                   | 0.93                        |
|               | NS3     | 92        | 69-247         | 0.93                     | 1600-1699                   | /                           |
| <b>BCM-43</b> | NS1     | 641       | 51-1806        | 1.00                     | 1887-2056                   | 0.95                        |
|               | NS2     | 114       | 51-229         | 0.95                     | 1887-2052                   | 0.95                        |
|               | NS3     | 87        | 51-229         | 0.95                     | 1582-1666                   | /                           |

| SKAV  |     |     |           |      |           |      |
|-------|-----|-----|-----------|------|-----------|------|
| SK-1  | NS1 | 641 | 69-1824   | 1.00 | 1907-2076 | 0.93 |
|       | NS2 | 114 | 69-247    | 0.94 | 1907-2072 | 0.93 |
|       | NS3 | 71  | 69-247    | 0.94 | 1600-1636 | /    |
|       | VP1 | 677 | 2069-2078 | 0.99 | 2152-4175 | 0.95 |
|       | VP2 | 634 | 2271-4175 | /    | /         | /    |
| SK-12 | NS1 | 641 | 68-1823   | 1.00 | 1906-2075 | 0.94 |
|       | NS2 | 114 | 68-246    | 0.94 | 1906-2071 | 0.94 |
|       | NS3 | 71  | 68-246    | 0.94 | 1599-1635 | /    |
|       | VP1 | 677 | 2068-2077 | 0.99 | 2151-4174 | 0.88 |
|       | VP2 | 634 | 2270-4174 | /    | /         | /    |
| SK-16 | NS1 | 641 | 69-1824   | 1.00 | 1907-2076 | 0.94 |
|       | NS2 | 114 | 69-247    | 0.94 | 1907-2072 | 0.94 |
|       | NS3 | 71  | 69-247    | 0.94 | 1600-1636 | /    |
|       | VP1 | 677 | 2069-2078 | 0.99 | 2152-4175 | 0.90 |
|       | VP2 | 634 | 2271-4175 | /    | /         | /    |
| SK-23 | NS1 | 641 | 69-1824   | 1.00 | 1907-2076 | 0.94 |
|       | NS2 | 114 | 69-247    | 0.94 | 1907-2072 | 0.94 |
|       | NS3 | 71  | 69-247    | 0.94 | 1600-1636 | /    |
|       | VP1 | 677 | 2069-2078 | 0.99 | 2152-4175 | 0.95 |
|       | VP2 | 634 | 2271-4175 | /    | /         | /    |
| SK-24 | NS1 | 641 | 69-1824   | 1.00 | 1907-2076 | 0.97 |
|       | NS2 | 114 | 69-247    | 0.94 | 1907-2072 | 0.97 |
|       | NS3 | 71  | 69-247    | 0.94 | 1600-1636 | /    |
|       | VP1 | 677 | 2069-2078 | 0.99 | 2152-4175 | 0.90 |
|       | VP2 | 634 | 2271-4175 | /    | /         | /    |
| SK-36 | NS1 | 641 | 69-1824   | 1.00 | 1907-2076 | 0.94 |
|       | NS2 | 114 | 69-247    | 0.94 | 1907-2072 | 0.94 |
|       | NS3 | 71  | 69-247    | 0.94 | 1600-1636 | /    |
| SK-39 | NS1 | 641 | 69-1824   | 1.00 | 1907-2076 | 0.94 |
|       | NS2 | 114 | 69-247    | 0.94 | 1907-2072 | 0.94 |
|       | NS3 | 71  | 69-247    | 0.94 | 1600-1636 | /    |
|       | VP1 | 677 | 2069-2078 | 0.99 | 2152-4175 | 0.9  |
|       | VP2 | 634 | 2271-4175 | /    | /         | /    |
| SK-47 | NS1 | 641 | 69-1824   | 1.00 | 1907-2076 | 0.93 |
|       | NS2 | 114 | 69-247    | 0.94 | 1907-2072 | 0.93 |
|       | NS3 | 71  | 69-247    | 0.94 | 1600-1636 | /    |
|       | VP1 | 677 | 2069-2078 | 0.99 | 2152-4175 | 0.90 |
|       | VP2 | 634 | 2271-4175 | /    | /         | /    |

\* Positions refer to each sequence as published in GenBank with accession numbers listed in Supplementary Table S1.

§ A / indicates that the site was absent (for VP2) or not detected using the splicing prediction algorithm (for NS3).
